# Supplementary material for: Metabolomics approach reveals high energy diet improves the quality and enhances the flavor of black Tibetan sheep meat by altering the composition of rumen microbiota
Source: PubMed Central journal article supplement (PMC9405419; doi:10.3389/fnut.2022.915558), 2022-08-10

Scores (PLS-DA)

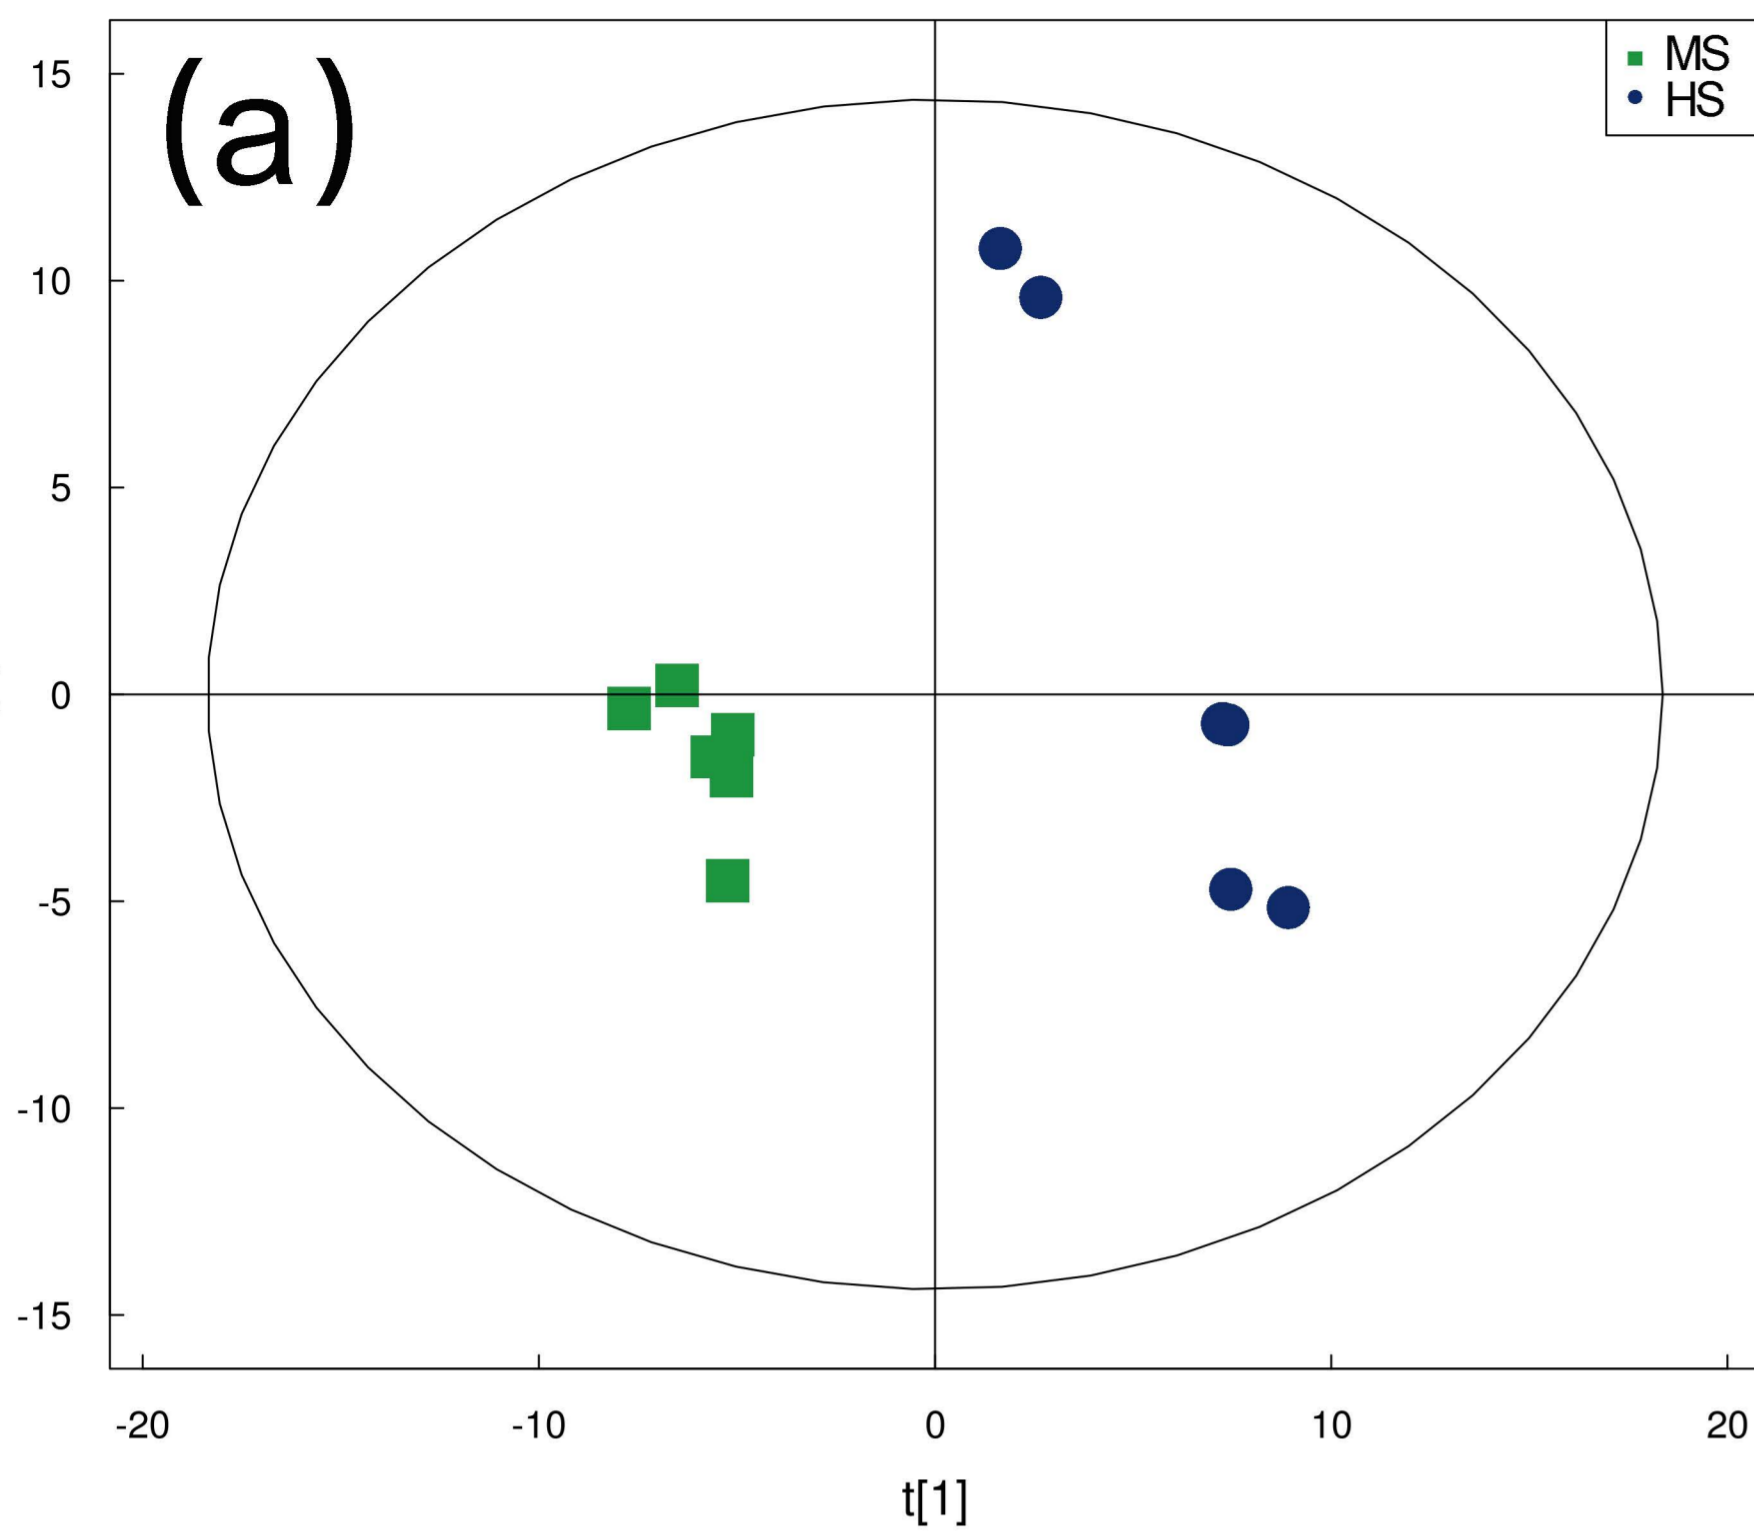

Scores (PLS-DA)

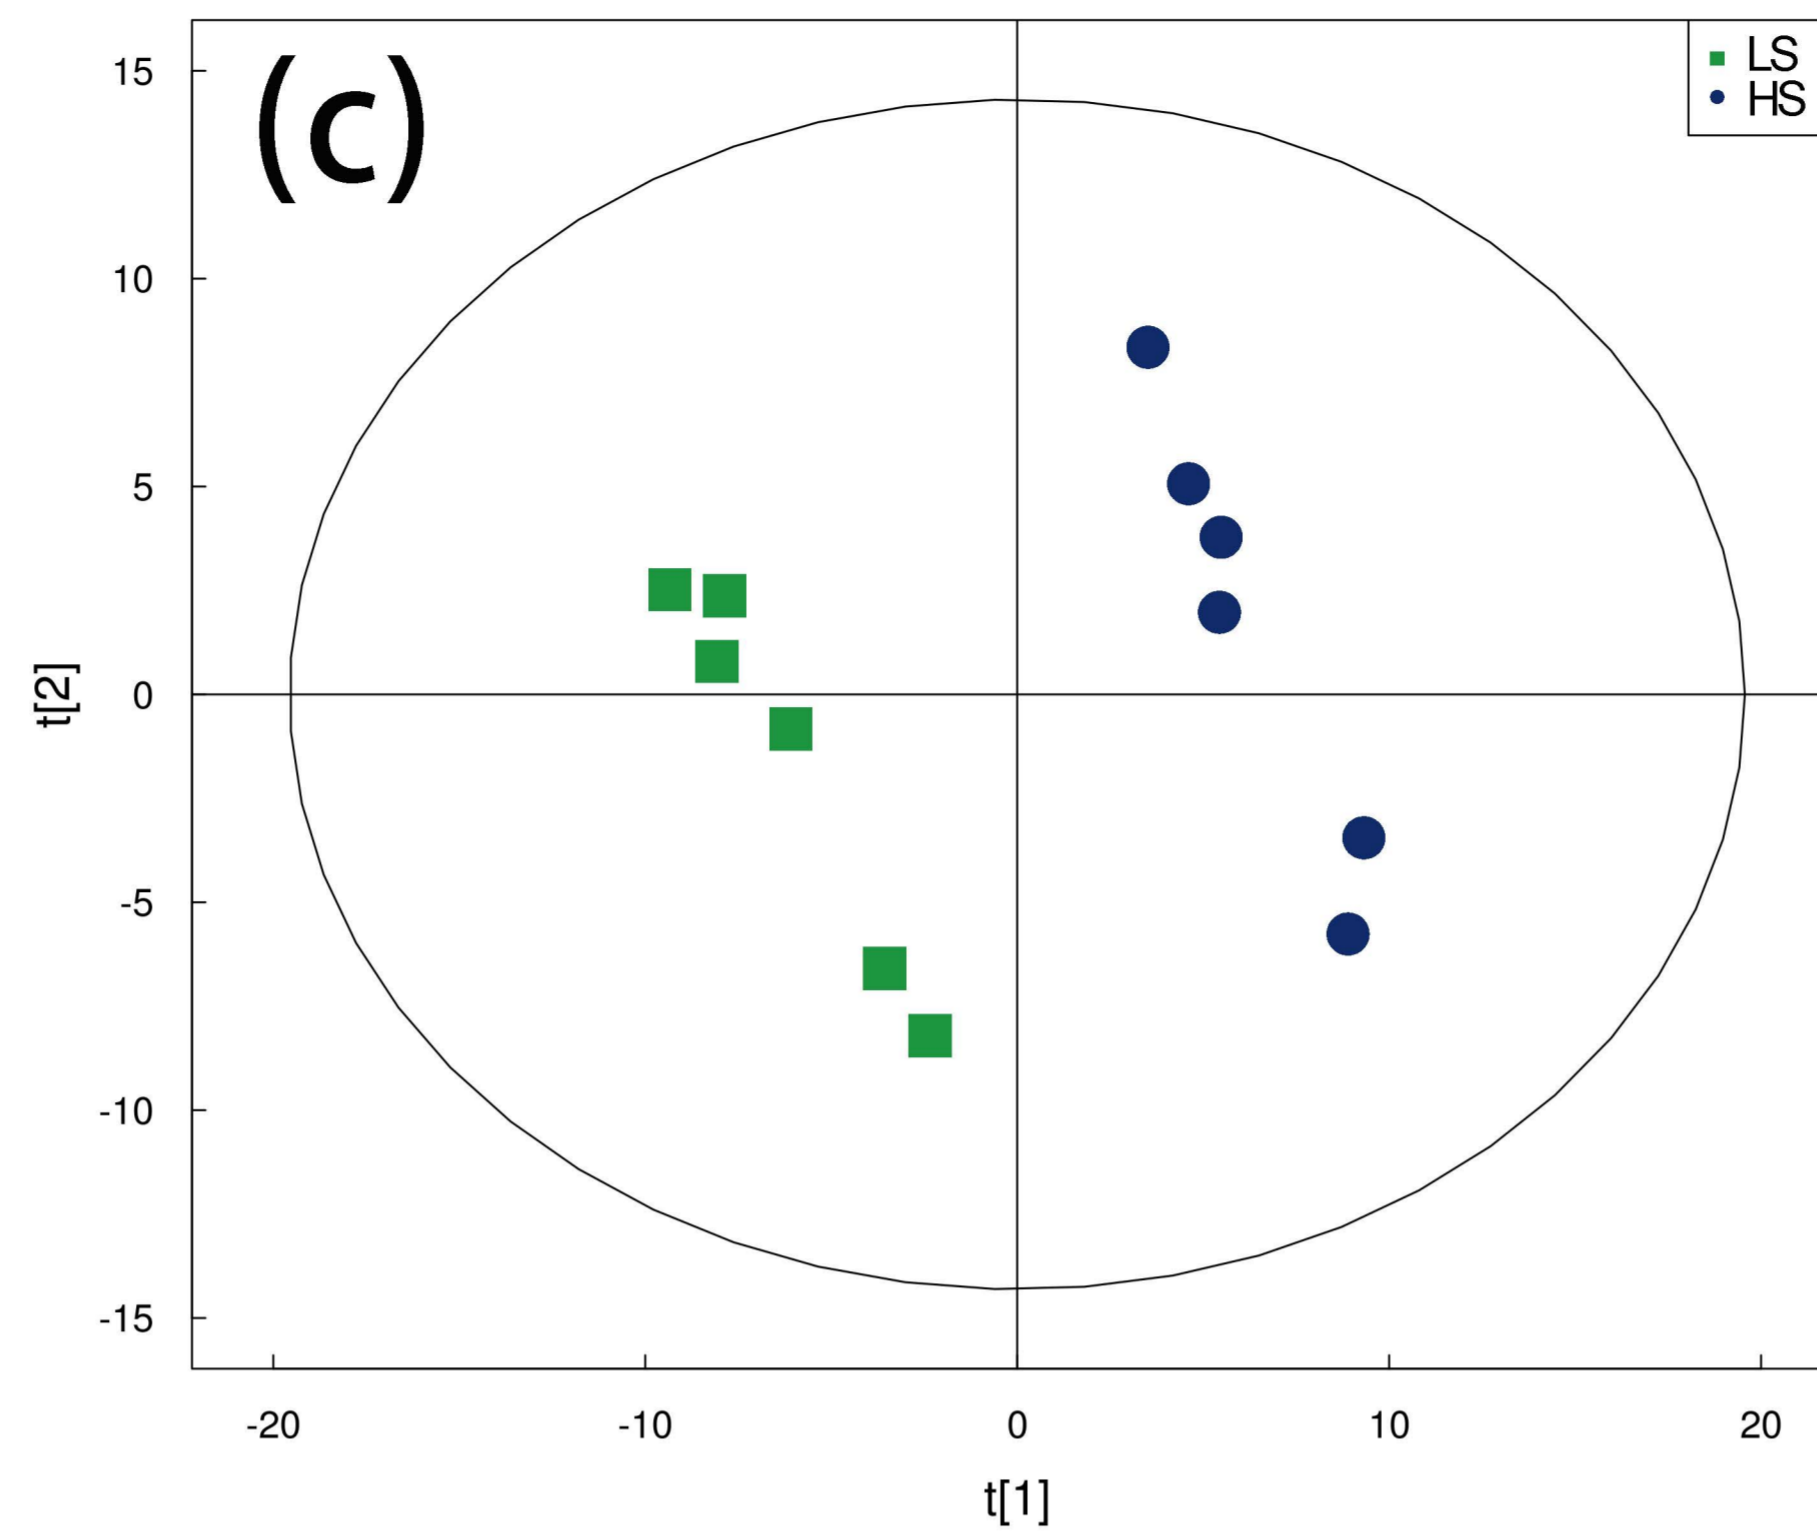

Scores (PLS-DA)

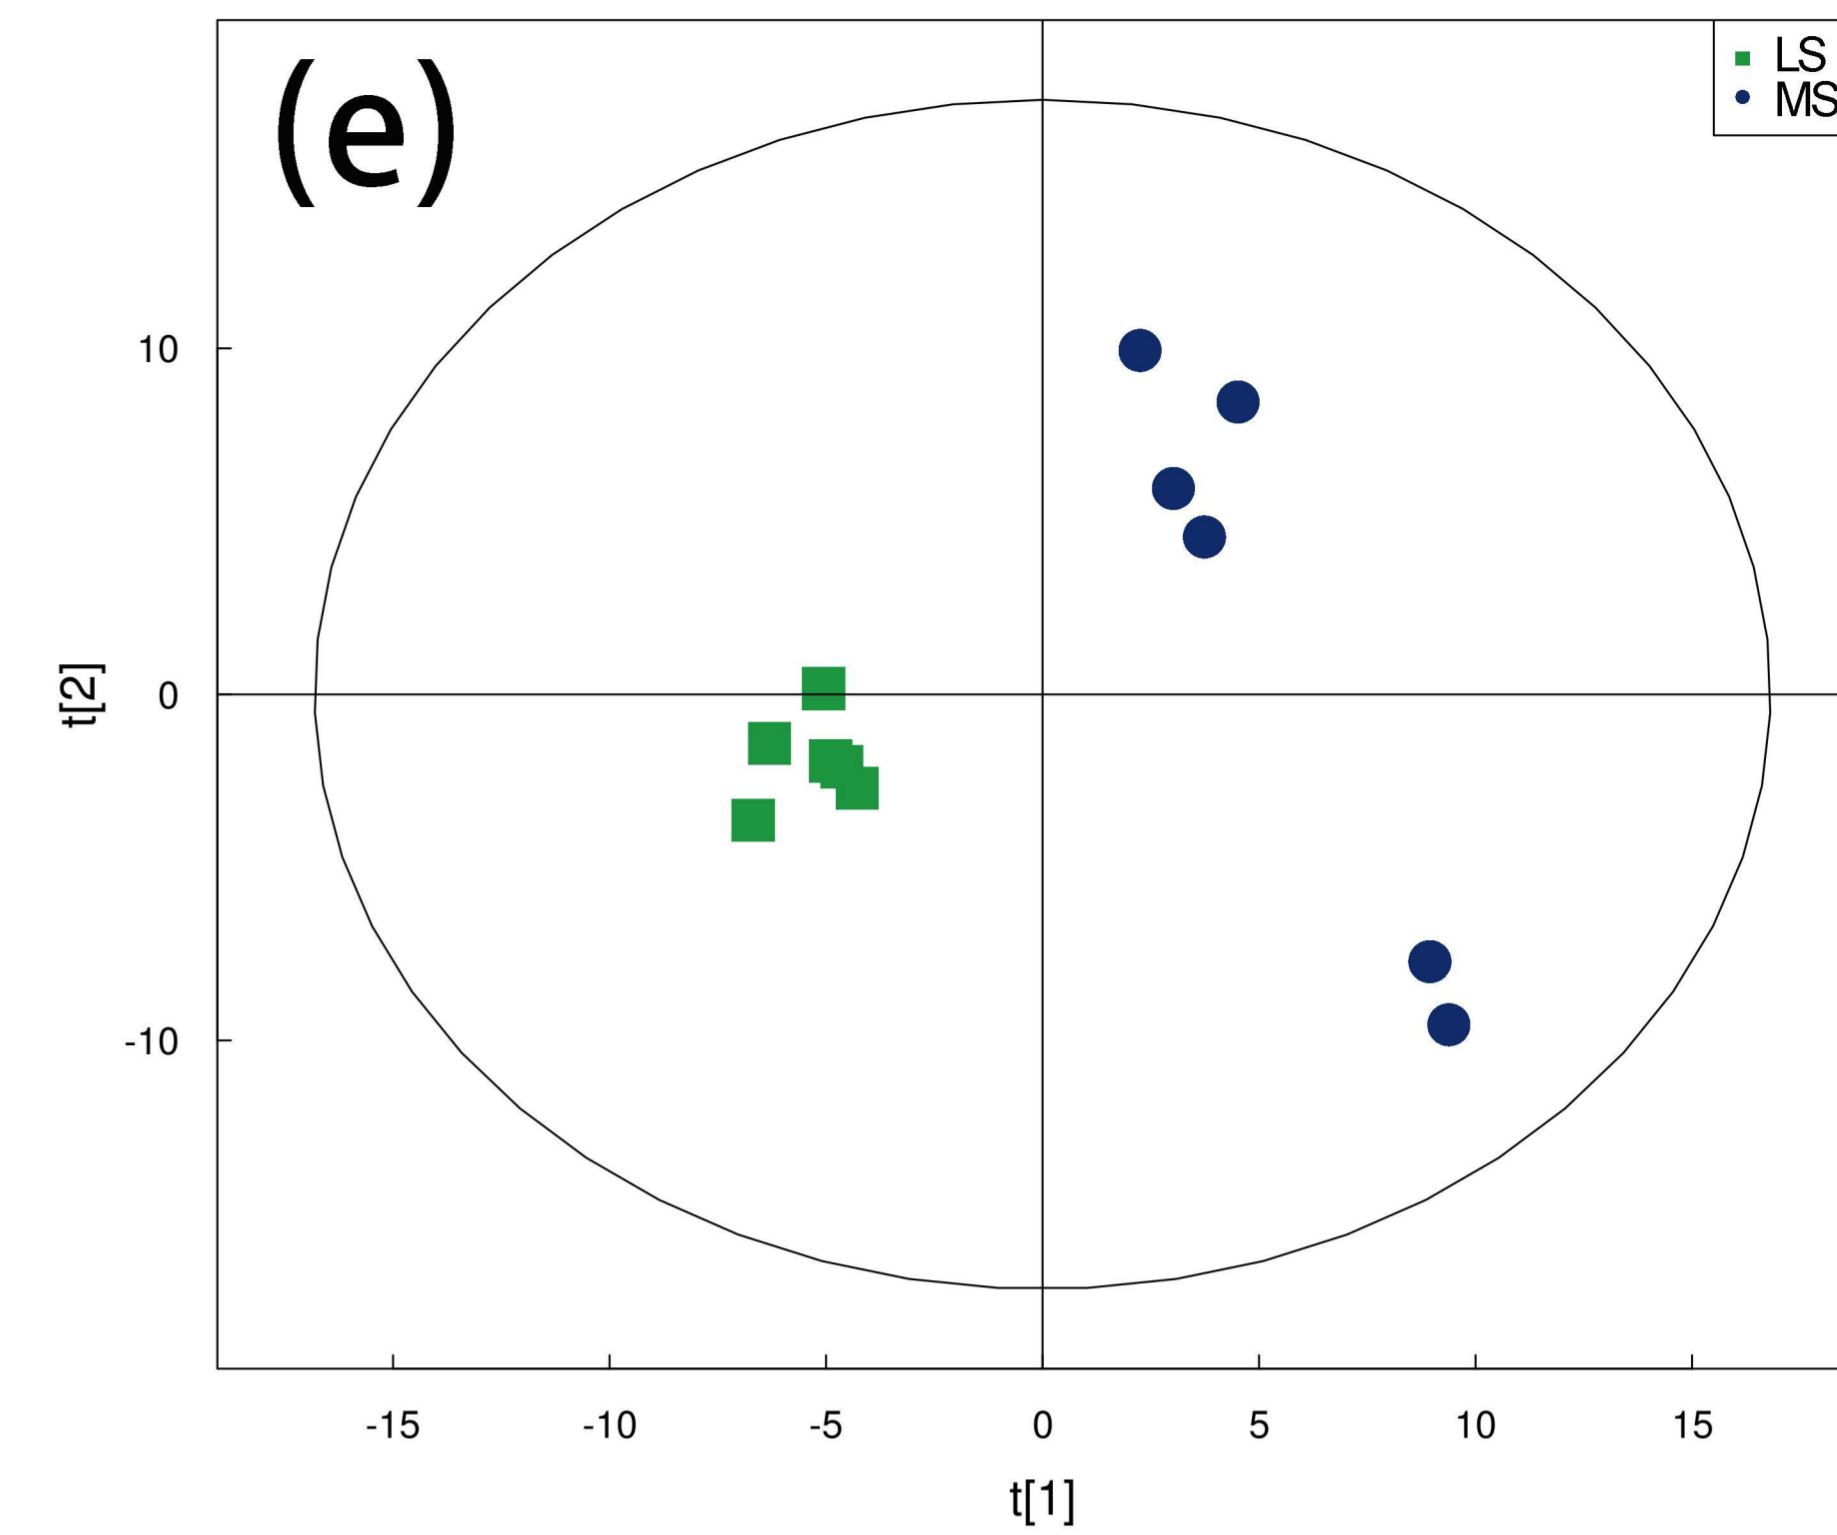

Scores (PLS-DA)

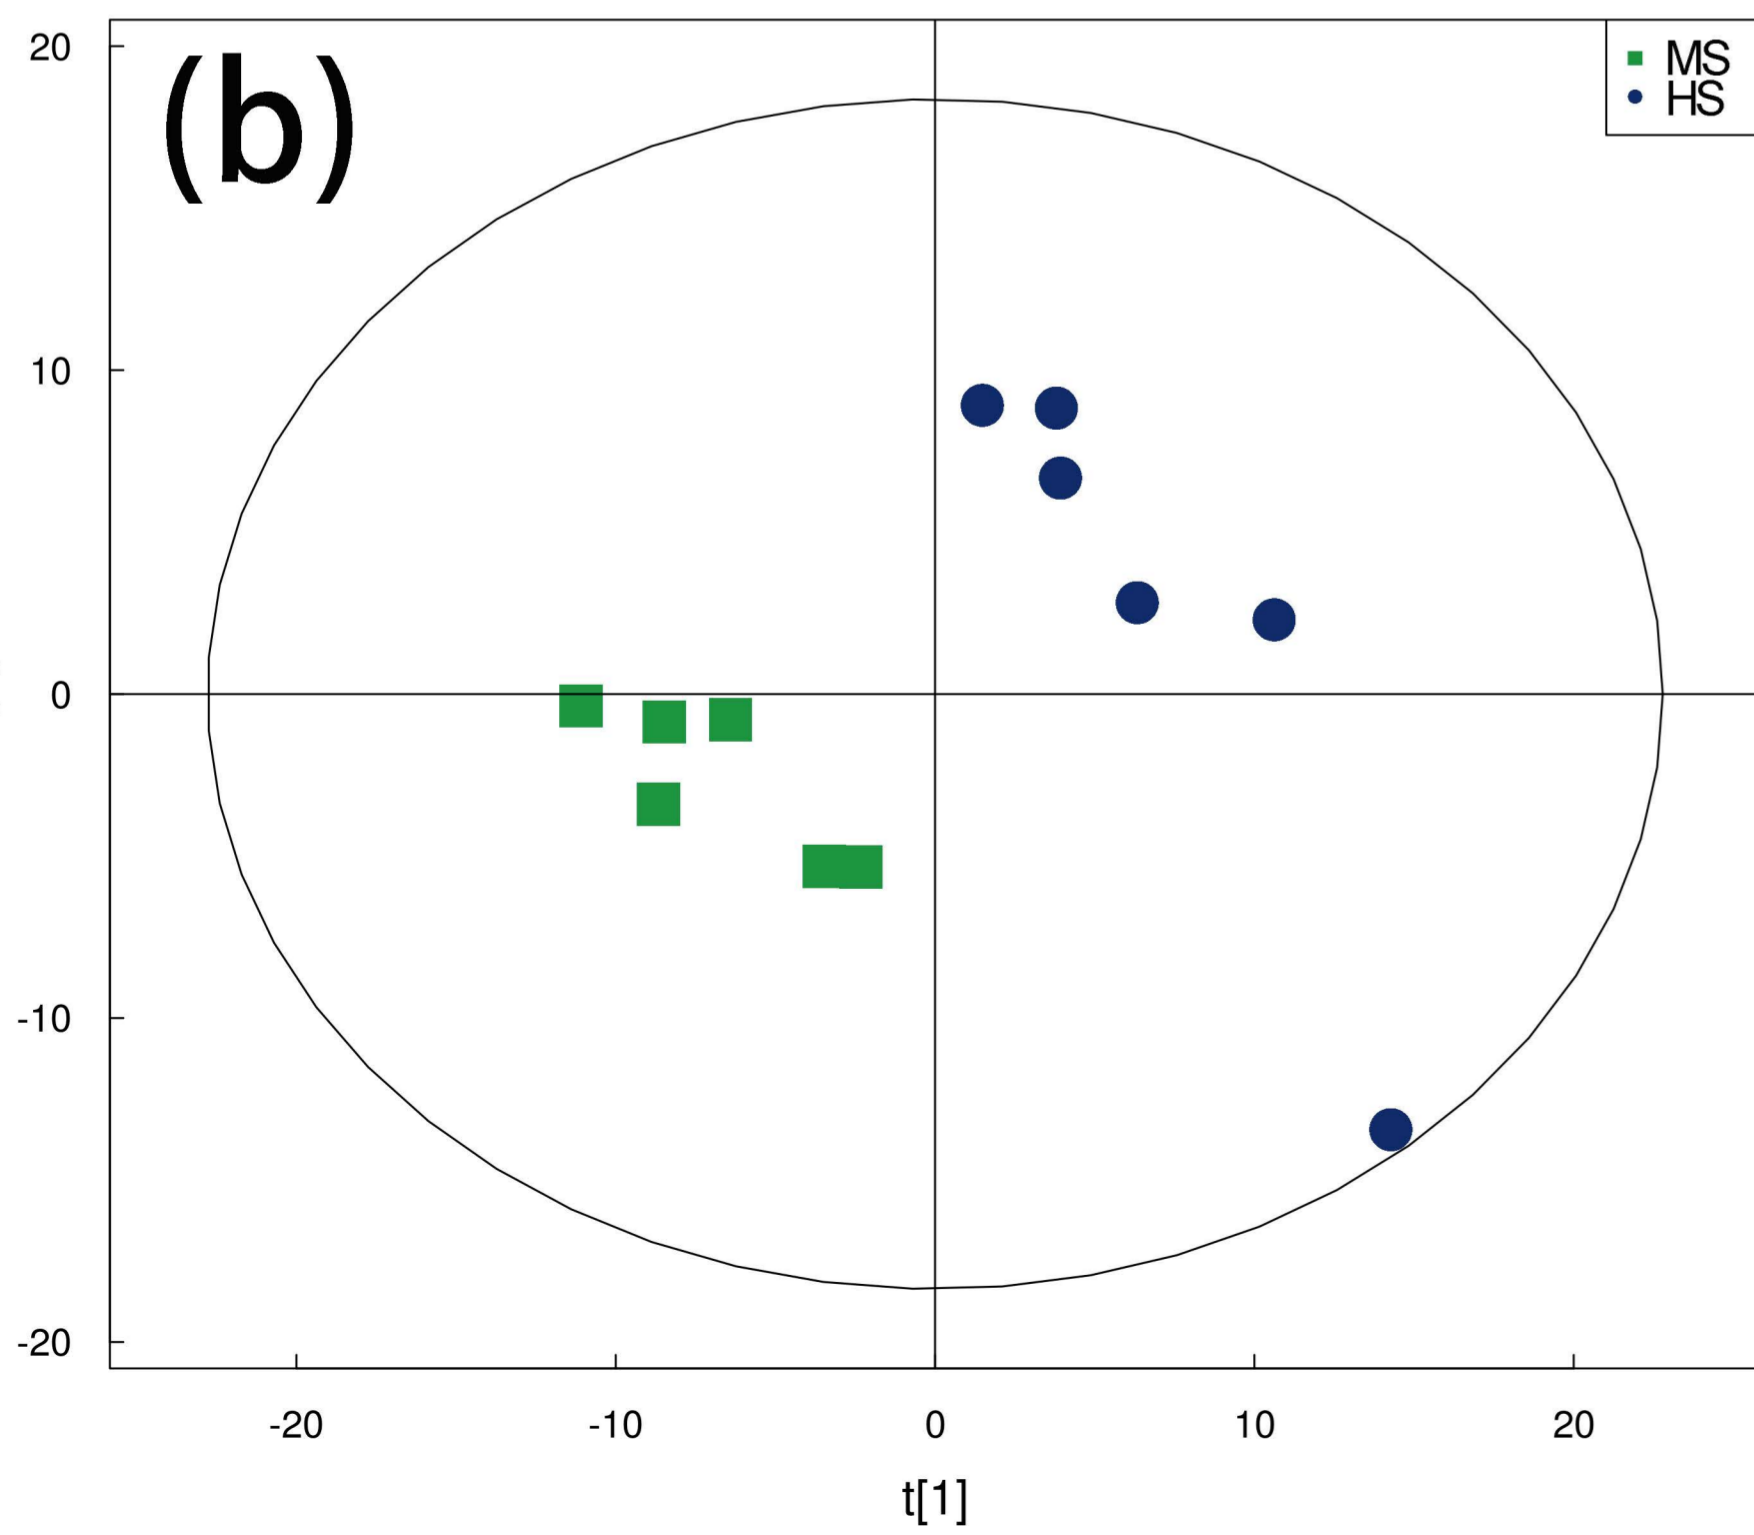

Scores (PLS-DA)

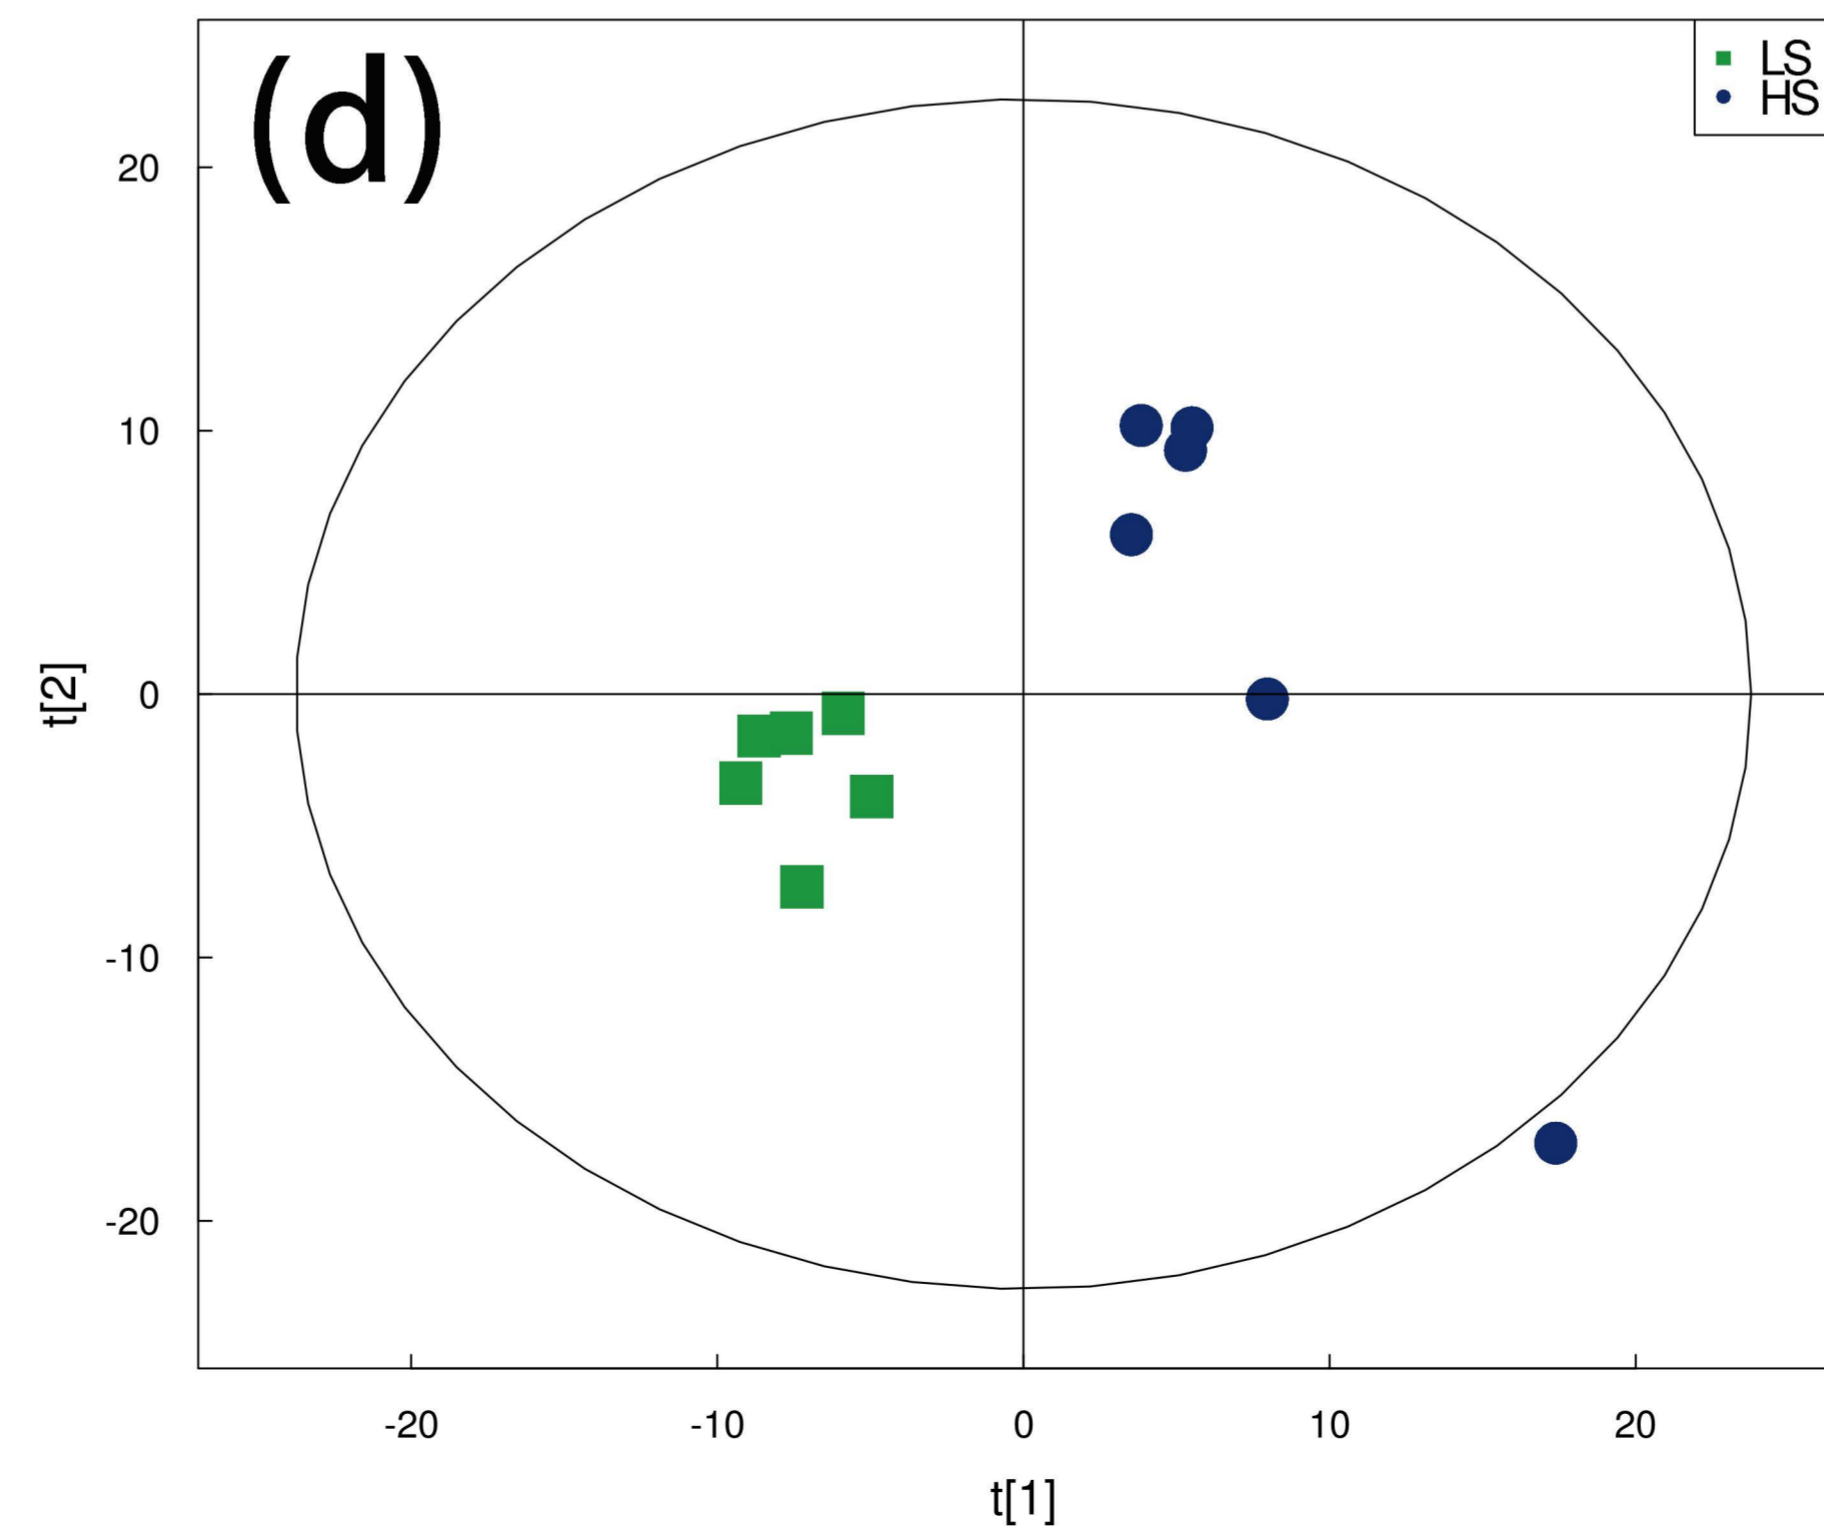

Scores (PLS-DA)

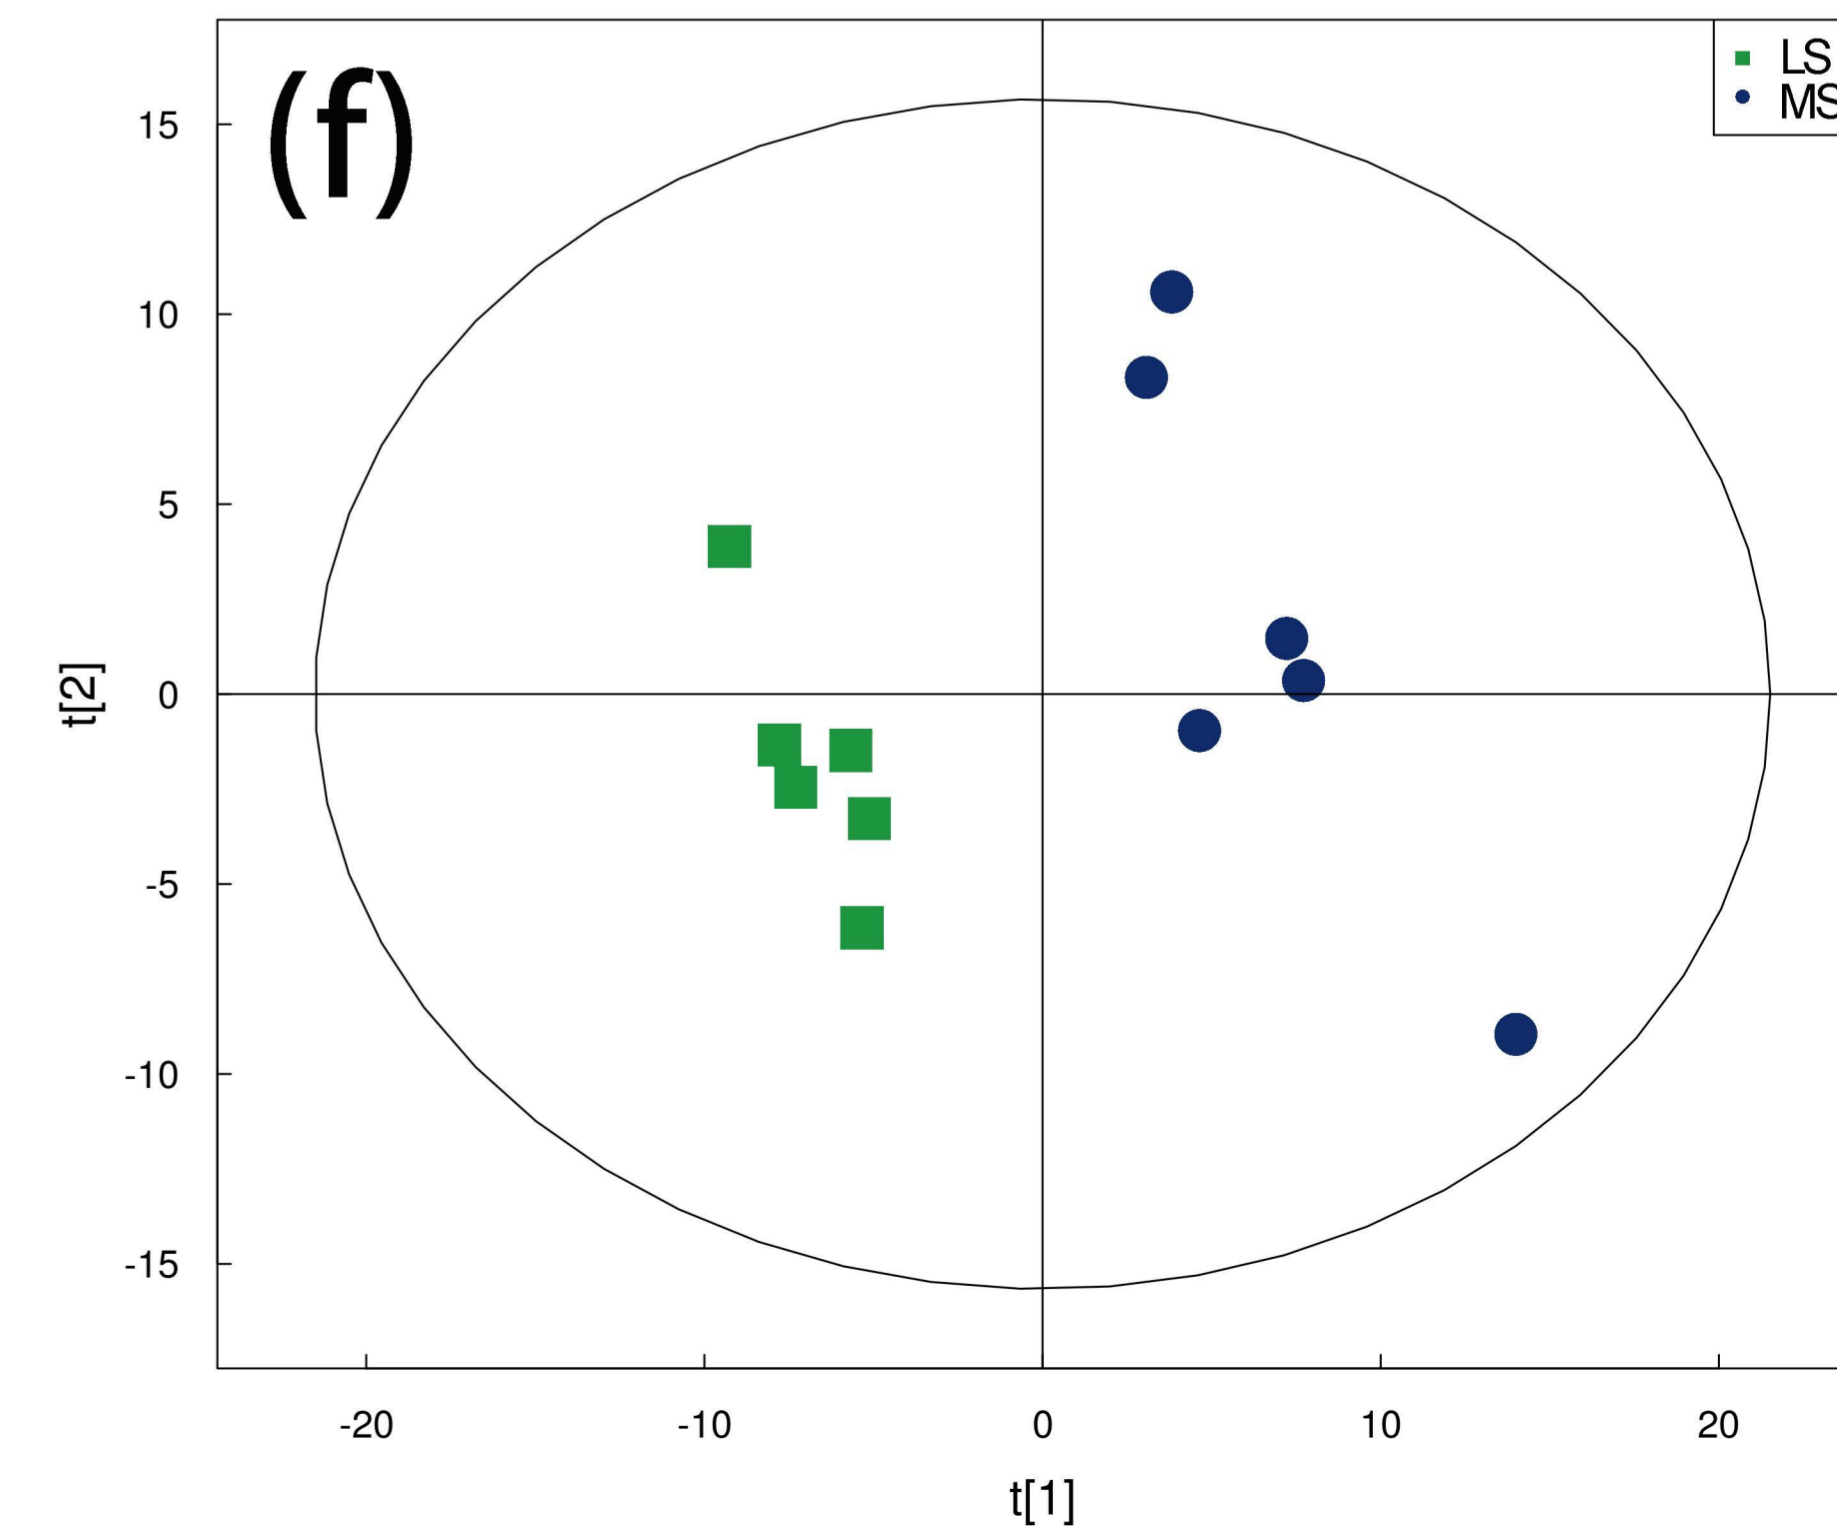

Supplement: Image_1.pdf [file Image_1.pdf]
